# Supplementary material for: When amine-based conducting polymers meet Au nanoparticles: suppressing H2 evolution and promoting the selective electroreduction of CO2 to CO at low overpotentials
Source: Royal Society of Chemistry journal article supplement (doi:10.1039/d0se01848a), 2020-12-23
Supplement: d0se01848a1.pdf [file d0se01848a1.pdf]

Electronic Supplementary Material (ESI) for Sustainable Energy & Fuels.

This journal is © The Royal Society of Chemistry 20XX

## Supporting information

**When amine-based conducting polymers meet Au nanoparticles: Suppressing H<sub>2</sub> evolution and promoting the selective electroreduction of CO<sub>2</sub> to CO at low overpotentials**

*Jialei Yu, Han Zhu\*, Jiace Hao, Huilin Li, Huining Li, Shuanglong Lu, Mingliang Du\**

Key Laboratory of Synthetic and Biological Colloids, Ministry of Education, School of Chemical and Material Engineering, Jiangnan University, Wuxi 214122, P. R. China

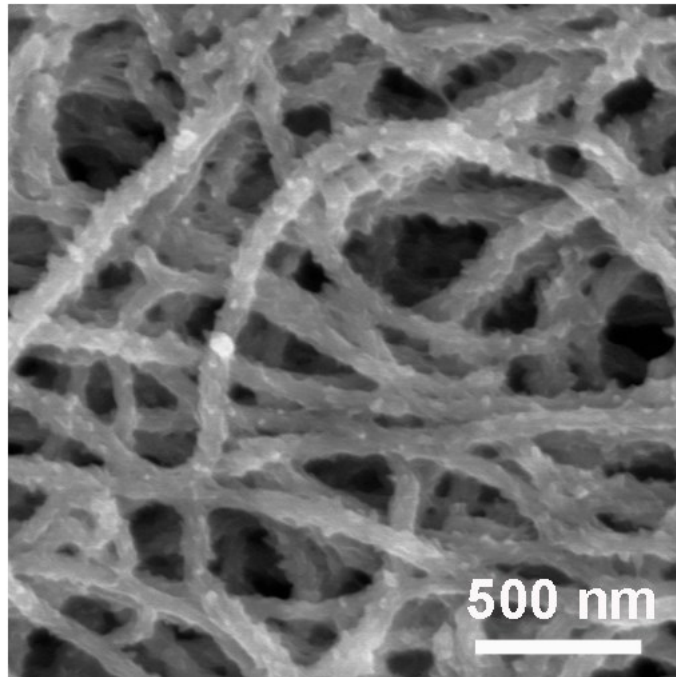

**Figure S1.** FE-SEM images of the PANI derived NCNFs.

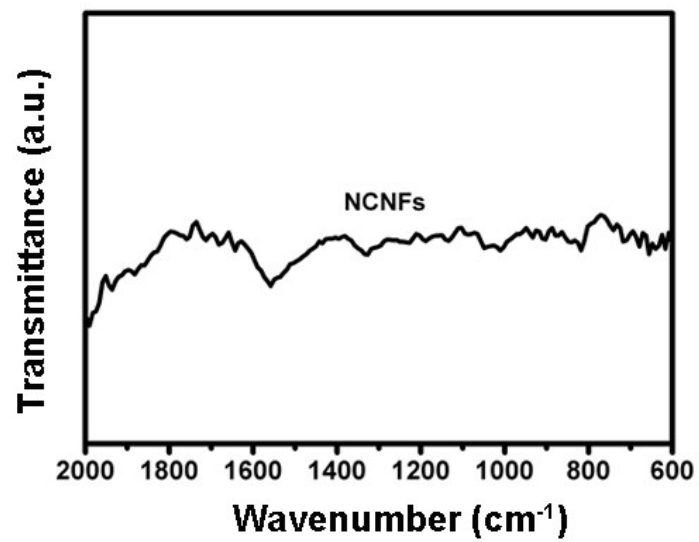

**Figure S2.** FTIR spectrum of the PANI derived NCNFs.

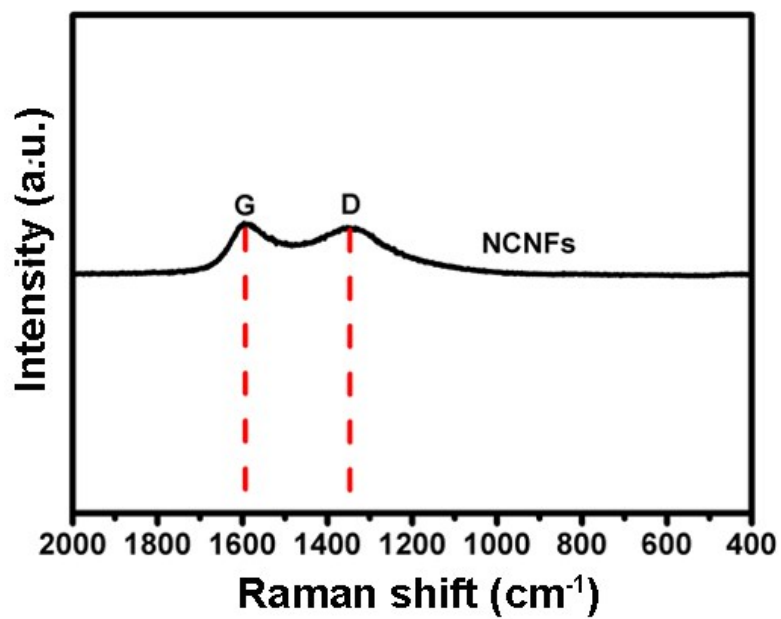

Figure S3. Raman spectrum of the PANI derived NCNFs before the CO<sub>2</sub>RR.

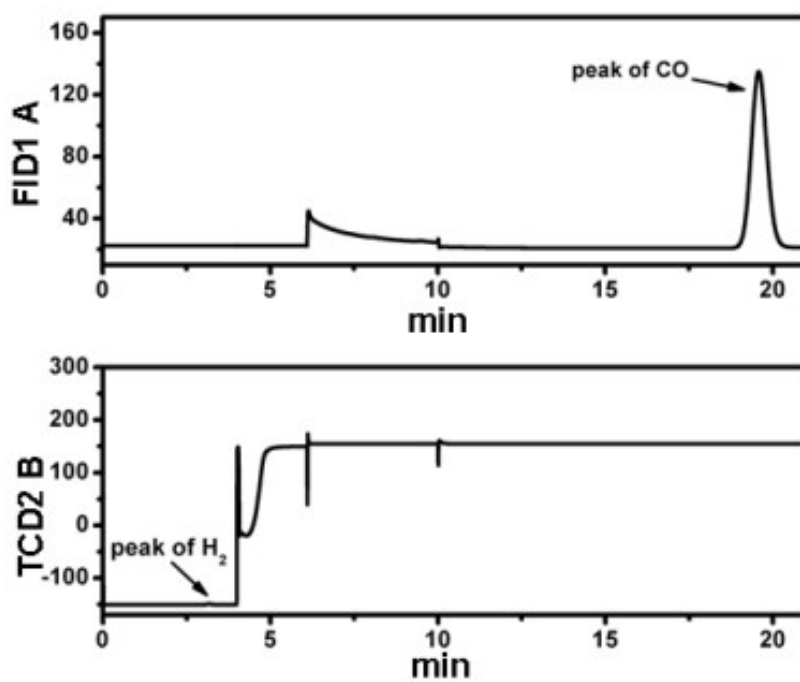

Figure S4. Reduction product tested by gas chromatography.

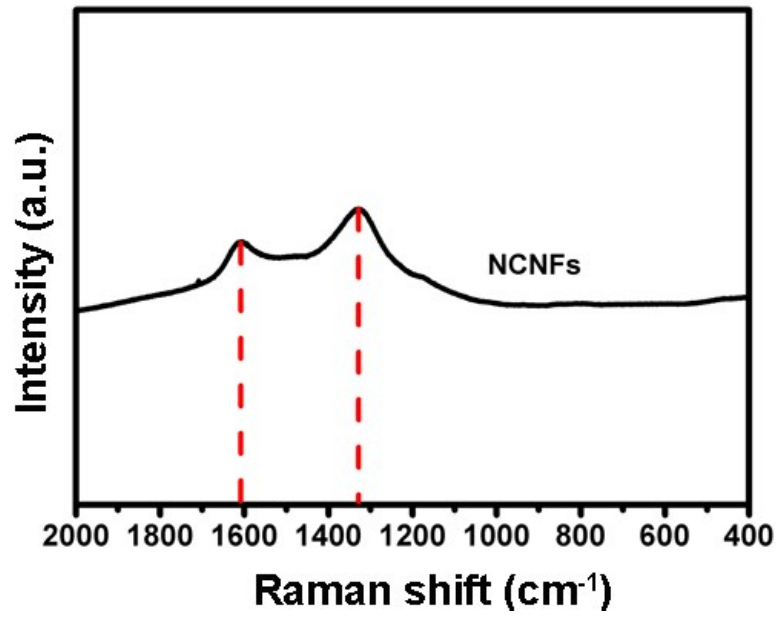

Figure S5. Raman spectrum of the NCNFs after the CO<sub>2</sub>RR.
